# Supplementary material for: CITED4 induces physiologic hypertrophy and promotes functional recovery after ischemic injury
Source: JCI journal article supplement (doi:10.1172/jci.insight.85904), 2016-06-15
Supplement: sd1 [file 1]

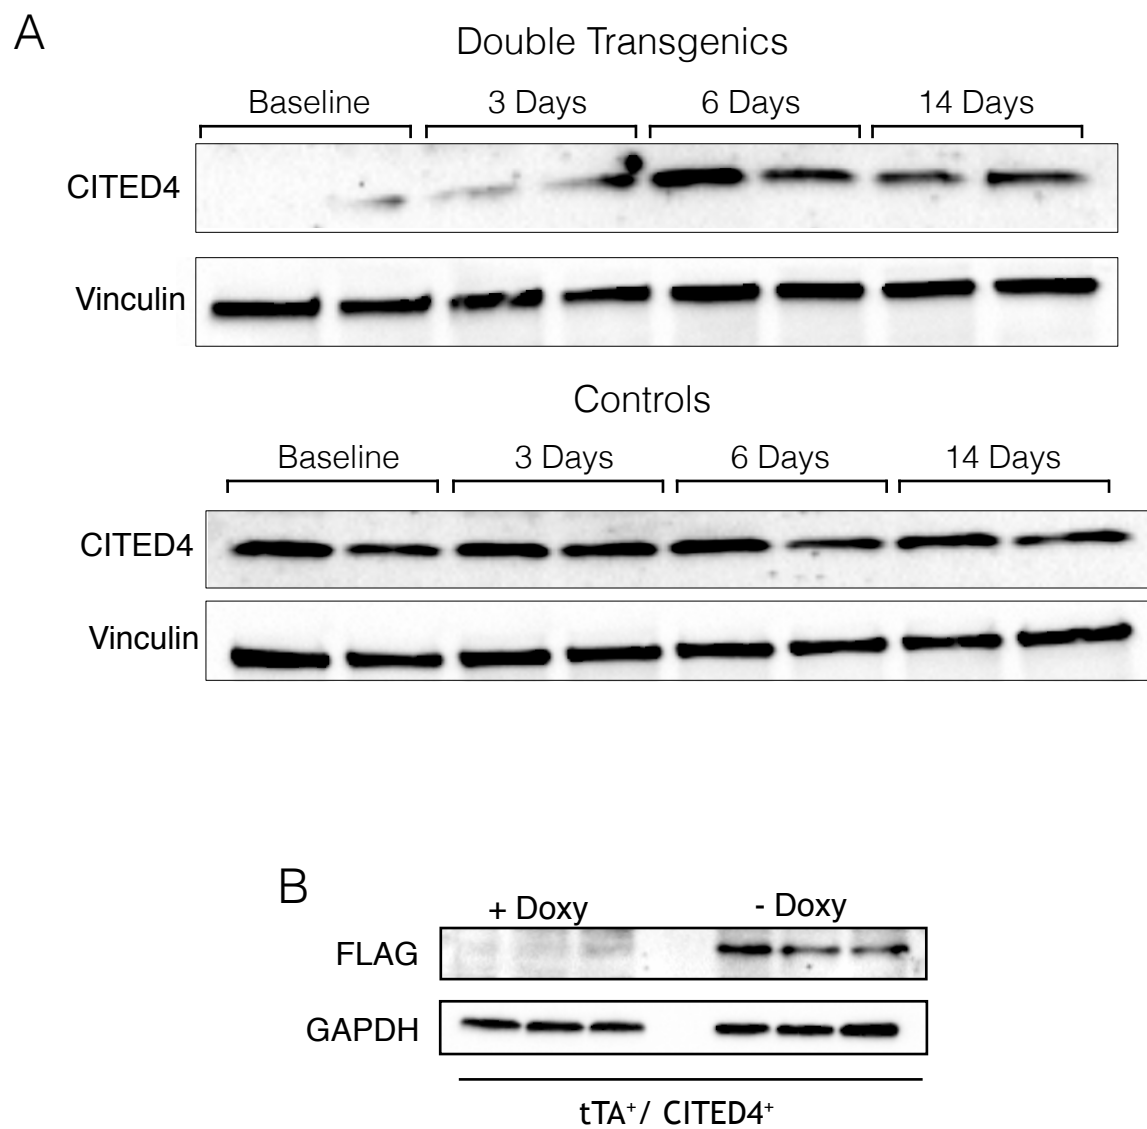

**Figure S1 related to Figure 1. Characterization of CITED4 expression in the inducible transgenic line.** A. Time course of cardiac expression of CITED4-FLAG after induction in the double transgenics. B. Expression of CITED4-FLAG after doxycycline removal.

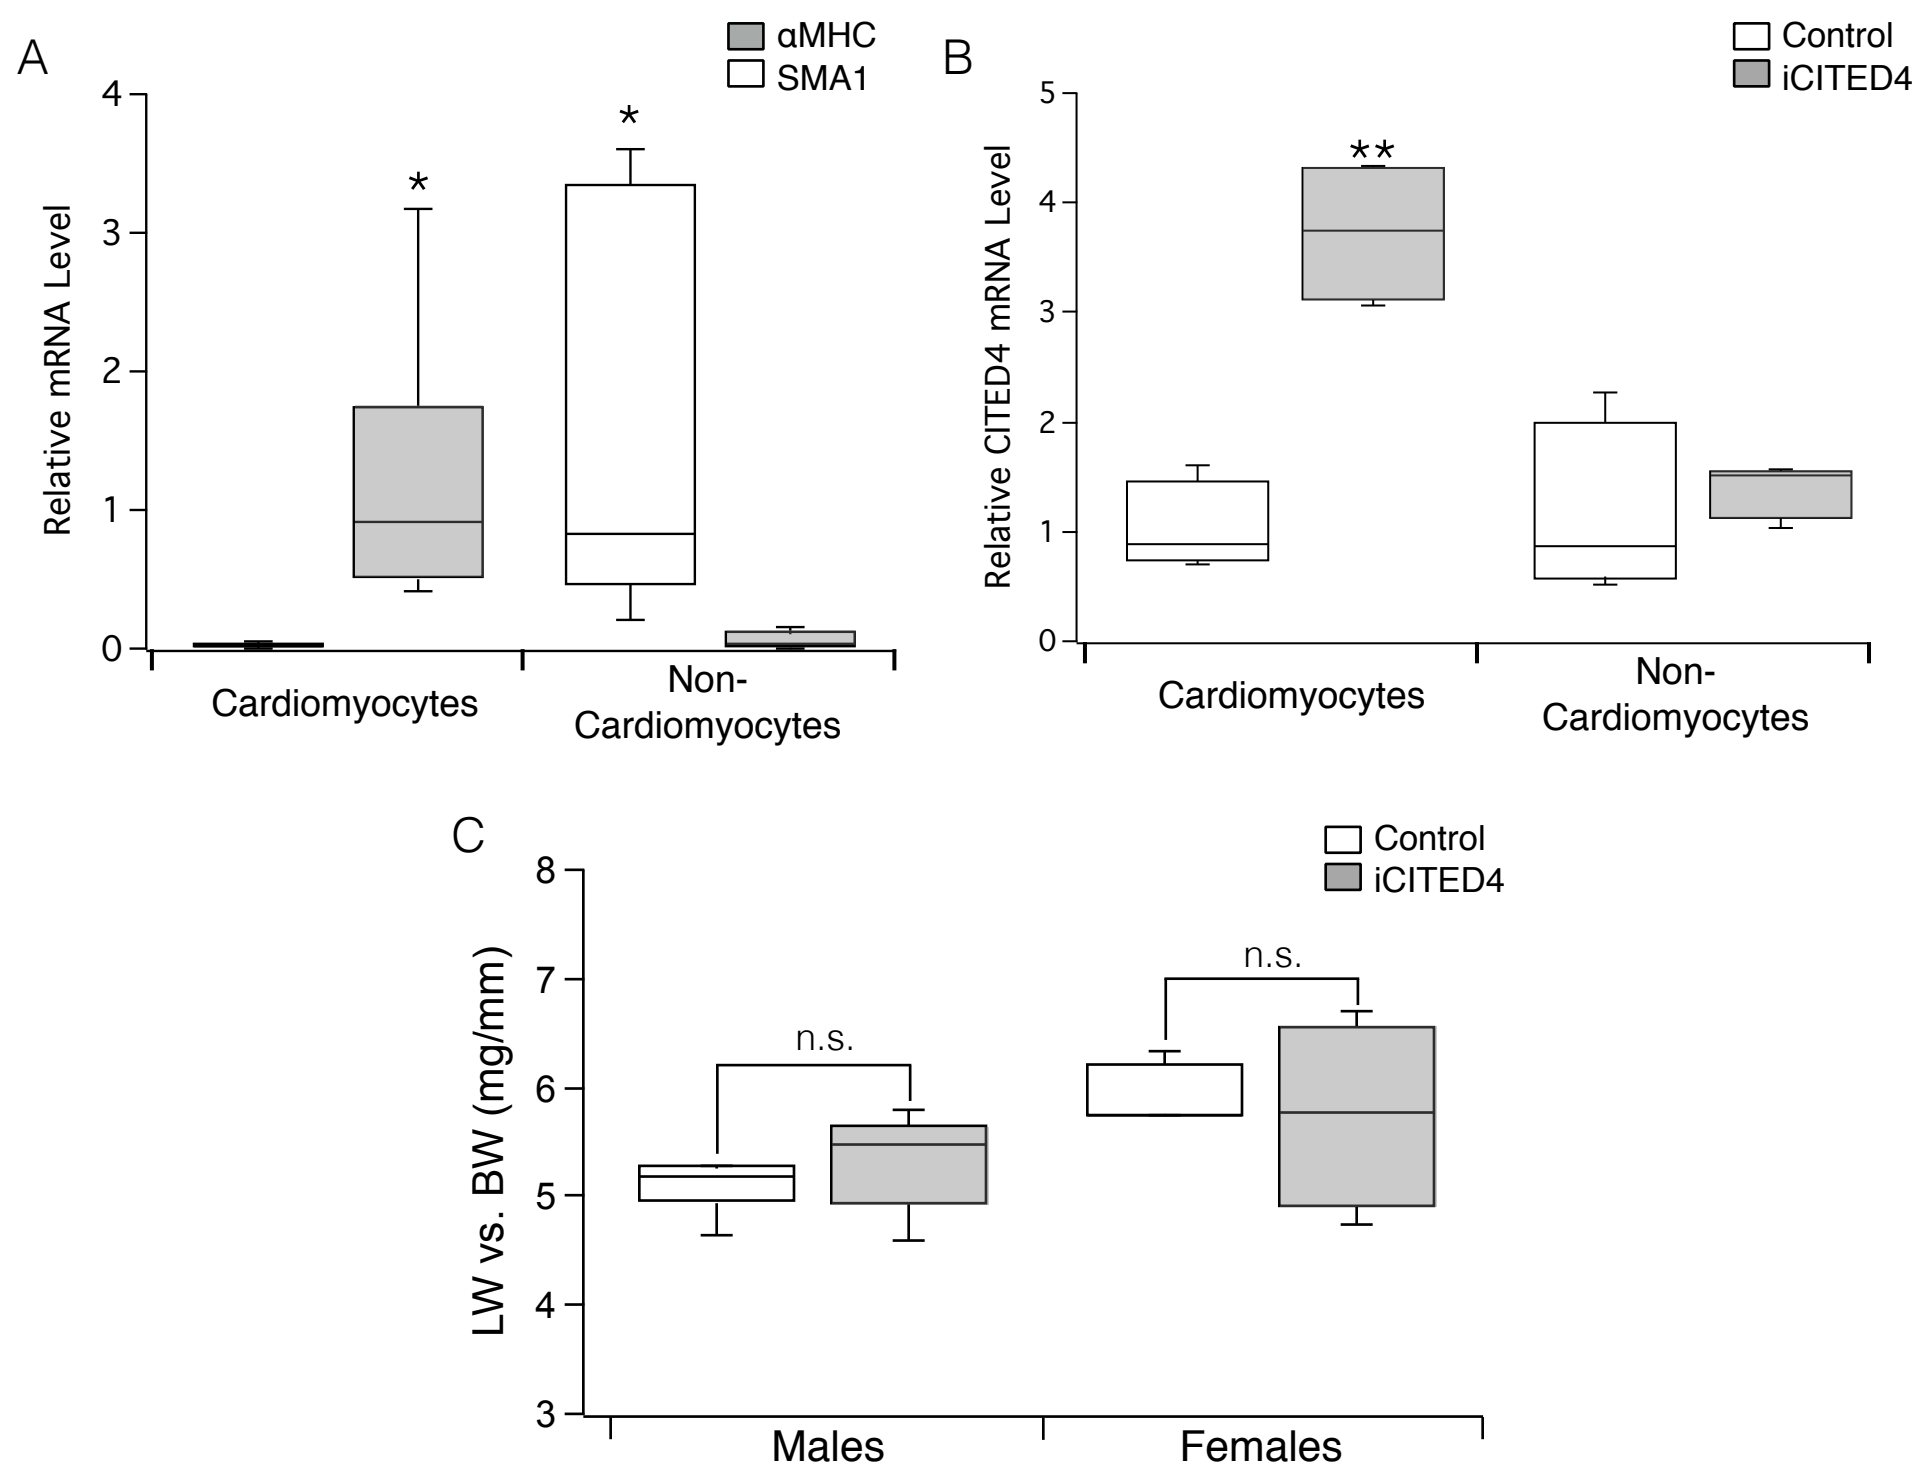

**Figure S2 related to Figure 1. Restricted expression of CITED4 is only in adult cardiomyocytes and not other cell types.** A. Relative mRNA levels of the  $\alpha$ MHC and SMA demonstrate separation of cardiomyocytes and non-cardiomyocytes. B. CITED4 expression is restricted to isolated adult cardiomyocytes, n = 4 mice per group. C. No significant change in lung weights as compared to body weight with CITED4 expression.

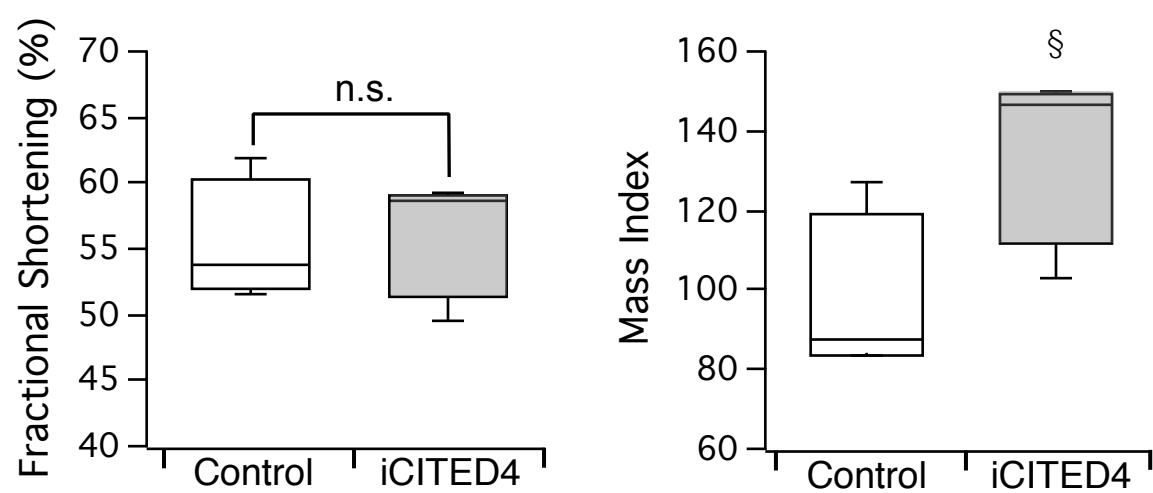

**Figure S3 related to Figure 1. Long term expression of CITED4 does not cause dysfunction.** Even after 4 months, CITED4 expression results in a trend towards cardiac hypertrophy without cardiac dysfunction. §  $p = 0.09$  with a one-tail t-test,  $n = 3$  mice per group.

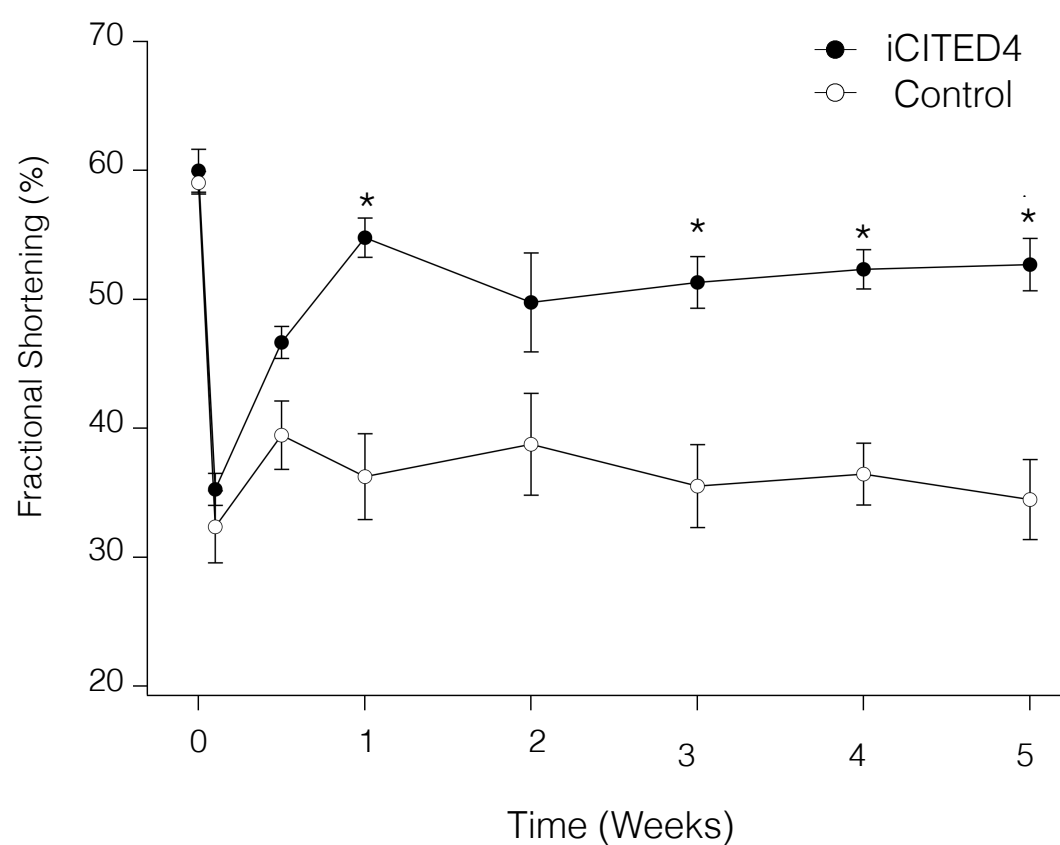

**Figure S4 related to Figure 3. Time course of improvement after ischemia and reperfusion injury in CITED4 transgenics.** Fractional shortening as a measure for left ventricular function begins to improve approximately 1 week after IRI.

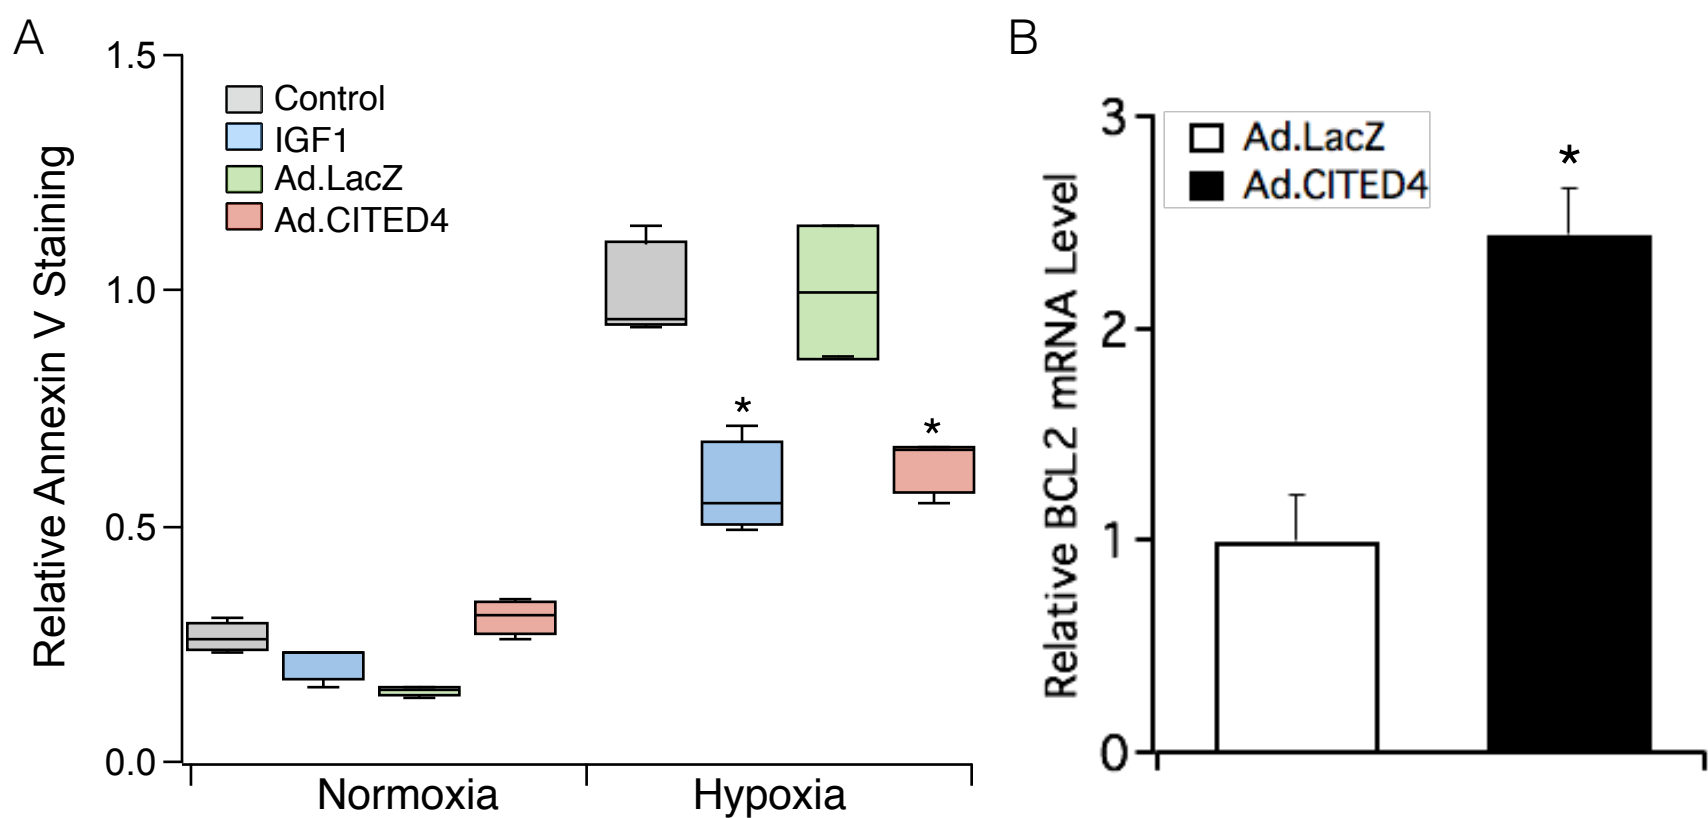

**Figure S5 related to Figure 5. CITED4 inhibits apoptosis in NRVMs after hypoxia and reperfusion.** A. Annexin V staining demonstrates an induction of apoptosis with hypoxia that is mitigated by expression of CITED4. B. Increased expression of BCL2 mRNA in NRVMs after transduction with adenovirus for CITED4. n = 3 for each condition. \*p < 0.05.

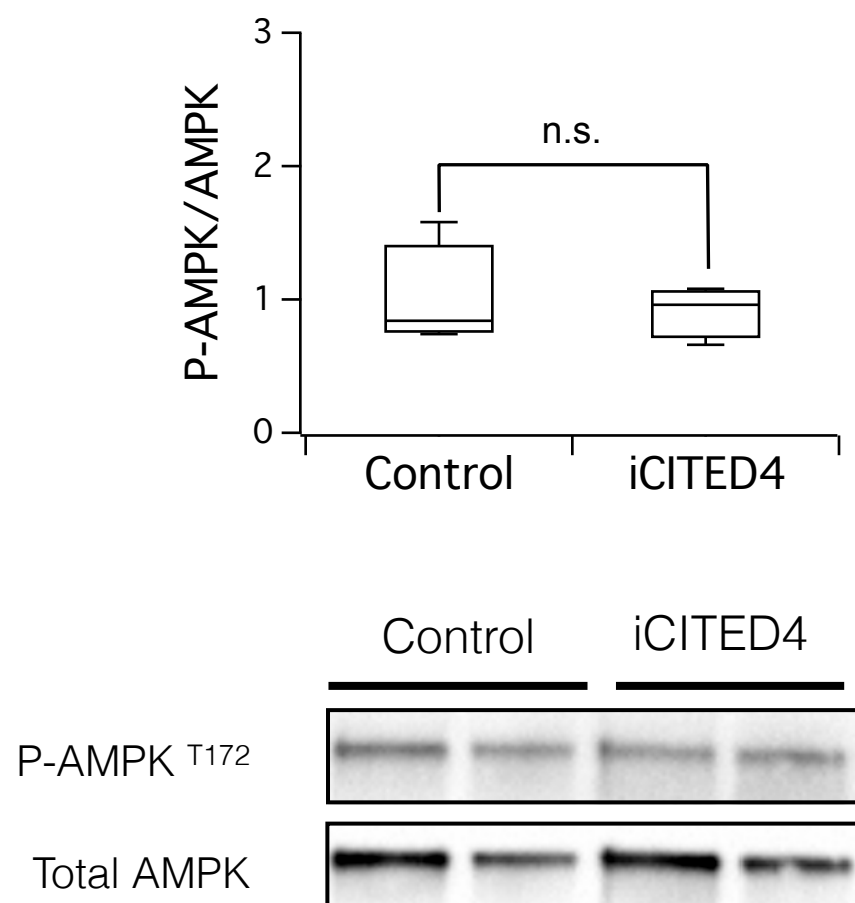

**Figure S6 related to Figure 5.** There is no change in AMPK activation with cardiac-restricted CITED4 expression after ischemia/reperfusion injury. N = 4 for each group. Significance determined by the student's t-test and n.s. = p-value is not significant.

Table S1

| Antibody           | Species | Catalog No. | Supplier        |
|--------------------|---------|-------------|-----------------|
| Cardiac Troponin T | Goat    | ab56357     | Abcam           |
| FLAG-HRP           | Mouse   | A8592       | Sigma           |
| mTOR               | Rabbit  | 2972        | Cell Signalling |
| p-AKT (S473)       | Rabbit  | 9271        | Cell Signalling |
| p-mTOR (S2448)     | Rabbit  | 2971        | Cell Signalling |
| GAPDH              | Rabbit  | 2118        | Cell Signalling |
| p-AMPK (T172)      | Rabbit  | 2531        | Cell Signalling |
| P-4E-BP1 (S65)     | Rabbit  | 9451        | Cell Signalling |
| PCM1               | Rabbit  | HPA023374   | Sigma           |
| CITED4             | Rabbit  | AV37255     | Sigma           |
| p62/SQSTM1         | Rabbit  | 5114        | Cell Signalling |

**Table S1. Antibodies used in this study.**
